1 **Muscle structure governs joint function: linking natural variation in medial gastrocnemius**  
2 **structure with isokinetic plantar flexor function**

3

4 John F. Drazan<sup>1</sup>, Todd J. Hullfish<sup>1</sup>, Josh R. Baxter<sup>1</sup>

5

6 <sup>1</sup>Department of Orthopedic Surgery, University of Pennsylvania, Philadelphia, Pennsylvania, United  
7 States

8

9 **Corresponding Author** Josh R. Baxter<sup>1</sup>

10 Human Motion Lab, 3737 Market Street, Philadelphia, Pennsylvania, 19104, United States

11 Email address: [josh.baxter@uphs.upenn.edu](mailto:josh.baxter@uphs.upenn.edu)

12 **Key words.** ultrasound, dynamometer, force-length, force-velocity

13 **Running title.** plantar flexor function correlates with fascicle length

14 **Word count.** 3,455

15 **Acknowledgements.** We would like to thank R. Mathew and S. Donde for assistance with data  
16 collection and processing.

17 **Funding.** This work was supported in part by the Thomas B. and Jeannette E. Laws McCabe Fund and  
18 NIH grant K12GM081259.

19 **Conflict of interest.** The Authors have no conflicts of interest to report.

20 **Author contributions.** TH and JB developed the study; TH collected the data; JD analysed the data;  
21 JD and JB drafted the manuscript; JB performed the computational modelling; all authors revised the  
22 document for intellectual content; all authors approved the final version of the manuscript; all authors  
23 agreed to be accountable for all aspects of the study.

24 **Study data.** Study data and simulation files are hosted online.

25 < <https://upenn.box.com/v/drazan-ankle-power-data> >

26

## 27 **ABSTRACT**

28           Generating ankle torque is critical for locomotion in elite athletes, the elderly, and many patient  
29 populations. Despite the robust findings linking plantar flexor muscle structure to gross function within  
30 these populations, the link between variation in plantar flexor fascicle length and ankle kinetics in  
31 healthy adults has not been established in the literature. In this study, we determined the relationship  
32 between medial gastrocnemius structure and peak torque and total work produced by the plantar  
33 flexors during maximal effort contractions. We measured resting fascicle length and pennation angle of  
34 the medial gastrocnemius using ultrasound in healthy adult subjects (N=12). Subjects performed  
35 maximal effort isometric and isokinetic contractions on a dynamometer. We found that longer fascicles  
36 were positively correlated with higher peak torque and total work ( $R^2 > 0.41$ ,  $p < 0.013$ ) across all  
37 isokinetic velocities, ranging from slow (30 degrees per second) to fast (210 degrees per second)  
38 contractions. Higher pennation angles were negatively correlated with peak torque and total work ( $R^2 >$   
39  $0.296$ ,  $p < 0.067$ ). None of these correlations were significant in isometric conditions. To further  
40 investigate the coupled effect of fascicle length and pennation angle variation, we used a simple  
41 computational model to simulate isokinetic contractions. These simulations confirmed that longer  
42 fascicle lengths generate more joint torque and work throughout a greater range of motion. This study  
43 provides experimental and computational evidence that links plantar flexor muscle structure and ankle  
44 kinetics in healthy young adults, which lends new insight into locomotor function in a range of  
45 subpopulations. adults which provides insight into patient recovery following Achilles tendon rupture.

## 46 **INTRODUCTION**

47           Plantar flexor function is a critical parameter for human movement in athletes, aging, and patient  
48 populations. Comprised of the soleus, lateral gastrocnemius, and medial gastrocnemius; the triceps  
49 surae muscles support and accelerate the body during ambulation. Although these plantar flexors  
50 appear small relative to knee and hip musculature, plantar flexor function is critical during walking (Graf  
51 et al., 2005; Judge et al., 1996), stair climbing (Suzuki et al., 2001), running (Ellis et al., 2014; Nesser et  
52 al., 1996), and jumping (Bobbert et al., 1986). Conversely, limited plantar flexor function is associated  
53 with decreased walking speed and mobility among elderly populations (Stenroth and Sipilä, 2016;  
54 Stenroth et al., 2015) and functional deficits in healthy young adults who suffer Achilles tendon injuries  
55 (Brorsson et al., 2018). Muscle wasting caused by aging affects the plantar flexors but can be mitigated  
56 with resistance training (Morse et al., 2007), highlighting the importance of maintaining muscle structure  
57 throughout the lifespan. Of these muscles, the gastrocnemius muscles are particularly important in  
58 generating plantar flexor power, due in part to the longer and less pennate muscle fascicles (Lieber and  
59 Fridén, 2000).

60           Gastrocnemius fascicle structure has been linked with plantar flexor function in athletic and  
61 patient populations. Trained sprinters have longer gastrocnemius fascicles than non-sprinters and  
62 untrained adults (Abe et al., 2000), leading to decreased muscle shortening velocities during a  
63 simulated push off of a sprint start (Lee and Piazza, 2009). Even among sprinters, longer and less  
64 pennate gastrocnemius fascicles are linked with faster sprint times (Abe et al., 2001; Kumagai et al.,  
65 2000). These links between gastrocnemius structure and plantar flexor function translate to patient  
66 populations as well. For example, the magnitude of plantar flexor power deficits in patients recovering  
67 from Achilles tendon ruptures is strongly correlated with the magnitude of remodeling of the medial  
68 gastrocnemius muscle, characterized by shorter resting fascicles (Hullfish et al., 2019a). Longer and  
69 less pennate gastrocnemius muscles increase the functional range of ankle motion during simulated  
70 muscle contractions by reducing muscle shortening velocity and operating for a longer amount of time  
71 in the optimal range of fascicle length (Baxter et al., 2018).

72            However, the effects of natural variation in gastrocnemius structure on plantar flexor function in  
73 healthy adults remains poorly understood. Longer and less pennate muscles operate at slower  
74 shortening velocities for a given muscular contraction, explaining the increase amount of muscle force  
75 (Lieber and Fridén, 2000). While longer medial gastrocnemius fascicles are correlated with increased  
76 muscle shortening speed (Hauraix et al., 2015; Thom et al., 2007), these findings have not been  
77 translated to voluntary plantar flexor kinetics measured *in vivo* using isokinetic dynamometry. Given  
78 that variation in gastrocnemius muscle structure is well documented (Kawakami et al., 2000) and is  
79 modified by injury, (Hullfish et al., 2019a), training (Salzano et al., 2018), and aging (Morse et al.,  
80 2005); determining if variations in fascicle length and pennation angle impacts voluntary function has  
81 important implications.

82            The purpose of this study was to determine the relationship between medial gastrocnemius  
83 muscle structure and plantar flexor function measured on an isokinetic dynamometer in healthy young  
84 adults. Given that longer and less pennate fascicles increase the potential for total muscle shortening  
85 velocity, we hypothesized longer fascicles correlate with increased plantar flexor torque and work and  
86 that increased pennation would correlate with decreased plantar flexor torque and work during  
87 voluntary isokinetic contractions. To test this hypothesis, we quantified medial gastrocnemius fascicle  
88 length and pennation angle using ultrasound imaging and measured plantar flexion torque and work in  
89 maximal isometric and isokinetic conditions at three rates of ankle rotation on an isokinetic  
90 dynamometer. Based on our previous computational modeling (Baxter et al., 2019), we hypothesized  
91 that fascicle length would be a stronger correlate of plantar flexor torque and work than pennation angle  
92 and muscle thickness. After we correlated medial gastrocnemius structure with plantar flexor isokinetic  
93 function, we used a musculoskeletal model to confirm the effects of varying optimal fascicle length and  
94 pennation angle on muscle kinetics and shortening velocity.

## 95 **METHODS**

96            We quantified medial gastrocnemius structure and plantar flexor function in 12 healthy young  
97 adults (6 male, 6 female, age:  $25 \pm 4.54$ , BMI:  $23.1 \pm 4.48$ ) who provided written informed consent in  
98 this study which was approved by the University of Pennsylvania IRB (#828374). Subjects were  
99 recreationally active and had no reported history of Achilles tendon injury or recent muscle injury in  
100 either leg. We acquired measurements of medial gastrocnemius structure and function of the right leg  
101 with subjects positioned prone on an isokinetic dynamometer (System 4, Biodex, Shirley, NY). Each  
102 subject was positioned on a treatment table that was rigidly secured to the dynamometer while wearing  
103 standardized lab shoes. After their foot was secured to the foot plate with the medial malleolus aligned  
104 with the spindle of the dynamometer, each subject selected their ankle range of motion by fully dorsi-  
105 flexing and plantar flexing their ankle. Once the subject specific range of motion was set, the  
106 investigator set the ankle neutral position, which was recorded for post-processing. To ensure  
107 consistency between subjects, all experimental procedures were performed by a single investigator.

108            To quantify medial gastrocnemius structure, we acquired ultrasound images of the medial  
109 gastrocnemius throughout the entire passive range of motion of each subject. We positioned the 7.5  
110 MHz, 6 cm probe (LV7.5/60/128Z-2, SmartUs, TELEMED) over the mid-substance of the muscle belly  
111 and secured it to the leg using a custom-made cast and strap system. Ultrasound images were  
112 acquired between 30 and 60 Hz while each subject's ankle was moved through its passive range of  
113 motion moving from plantar flexion to dorsiflexion at a rate of 10 degrees/s. We quantified resting  
114 fascicle length, pennation angle, and muscle thickness with the ankle at the resting angle rather than at  
115 neutral to avoid stretching the fascicles (Aeles et al., 2017). This resting angle was set to 16 degrees  
116 plantar flexion for all subjects based on values of average resting ankle position across 42 patients

117 reported in the literature (Zellers et al., 2018). We manually  
118 identified the superficial and deep aponeuroses and a  
119 muscle fascicle by selecting two points on each structure to  
120 form a line (**Figure 1**). This manual approach of fascicle  
121 measurement has been demonstrated to be repeatable  
122 within the same observer (Drazan et al., 2019). We  
123 calculated fascicle length as the distance between the  
124 superficial and deep attachments of the fascicle and  
125 pennation angle as the angle between the fascicle and the  
126 deep aponeurosis. Muscle thickness was calculated as the  
127 fascicle length multiplied by the sine of the pennation angle.  
128 We measured fascicles that were in the middle of the  
129 imaging frame for all subjects. In case that the entire fascicle  
130 was not in frame, linear extrapolation was used to calculate  
131 fascicle length. We averaged each measurement of  
132 structure across three passive range of motion trials to  
133 determine the measures of resting muscle structure we used  
134 in our analyses.

135 To determine plantar flexor work and peak torque,  
136 subjects performed maximal voluntary plantar flexor  
137 contractions on an isokinetic dynamometer. Subjects performed maximal isometric contractions at  
138 neutral ankle angle and isokinetic contractions at three rotational velocities across their range of  
139 motion. The subject's right foot was secured to a foot plate with the medial malleolus of the ankle  
140 aligned with the dynamometer's spindle. First, we measured peak isometric plantar flexor torque with  
141 the ankle at neutral with subjects in prone position. Next, peak isokinetic plantar flexion contractions  
142 were performed throughout a subject's entire range of motion at three speeds: slow (30 degrees per  
143 second), medium (120 degrees per second), and fast (210 degrees per second). At the start of each of  
144 these trials, we confirmed that the subject positioned their ankle in their peak dorsi-flexion angle. We  
145 provided verbal encouragement (McNair et al., 1996) as well as visual feedback to ensure that subjects  
146 maximally contract their plantar flexors during each condition. Contractions were not ramped, instead  
147 subjects were instructed to immediately "push as hard and as fast as they could." Subjects continued to  
148 perform maximal plantar flexion contractions for each test condition until the peak torque was  
149 consistent for two consecutive trials.

150 To test our hypothesis that fascicle length would be positively and strongly correlated with  
151 plantar flexor function and that pennation angle would be negatively and moderately correlated with  
152 plantar flexor function, we performed univariate linear regression to determine the relationship between  
153 measures of medial gastrocnemius structure with peak plantar flexor torque and work at each  
154 contraction condition. We calculated the strength correlation for each of these regression analyses  
155 using the coefficient of determination ( $R^2$ ), which is an index of the correlation strength ranging between  
156 0 and 1 where values between 0 and 0.04 indicate negligible correlation, 0.04 and 0.25 indicate weak  
157 correlation, 0.25 and 0.64 indicate moderate correlation, and 0.64 and 1 indicate strong correlation  
158 (Morton et al., 2005). We set an *a priori* alpha level of 0.05 and performed all statistical analysis using  
159 scientific computing software (MATLAB, MathWorks, Natick, MA).

160 Because muscle structure and anthropometry varied in our subjects, we quantified muscle  
161 thickness and lower-leg length to determine if these factors accounted for some of the variability in  
162 plantar flexor kinetics. We calculated muscle thickness as the product of the resting fascicle length and

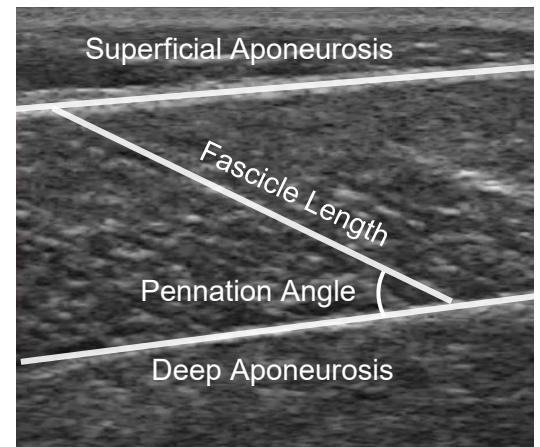

**Figure 1** (1 column). **Resting muscle architecture was measured from an ultrasound frame captured at 16° plantar flexion.** An examiner identified the two aponeuroses as well as a fascicle within the frame, each of which was approximated as a straight line. Pennation angle was calculated as the angle between the fascicle and the deep aponeurosis and muscle thickness was calculated as the sine of the pennation angle times the length of the fascicle.



163 the sine of the pennation angle. We quantified lower-leg length by measuring the distance between  
164 reflective markers placed on the lateral malleolus and the proximal head of the fibula that was  
165 measured using a 12 camera motion capture system (Raptor Series, Motion Analysis Corporation,  
166 Rohnert Park, CA). To evaluate the effect of patient stature on resting muscle structure, we linearly  
167 regressed fascicle length, pennation angle, and muscle thickness against body mass and leg length.  
168 Additionally, muscle thickness was linearly regressed against fascicle length and pennation angle.

169 We simulated the 3 isokinetic contraction speeds to demonstrate how variations in fascicle  
170 length and pennation angle affected joint kinetics and muscle shortening velocity (Fig. 4A) using a  
171 musculoskeletal model (Baxter and Hast, 2019; Delp et al., 2007). Briefly, the ankle was constrained by  
172 a pin joint and actuated by a combined gastrocnemius muscle, soleus muscle, and tibialis anterior  
173 muscle. The musculoskeletal model was positioned in the prone position and resting ankle angle was  
174 set at 16 degrees plantar flexion, which matched previous literature reports (Zellers et al., 2018) and  
175 the ankle angle at which we measured medial gastrocnemius structure in the current study. During  
176 each test speed, we changed the optimal fascicle length (which we will refer to as fascicle length for  
177 consistency with our *in vivo* measurements) and pennation angle of both the gastrocnemius and soleus  
178 muscles. We set the fascicle length of the gastrocnemius muscle to 64 mm and the pennation angle to  
179 22 degrees, which we acquired from ultrasound images of our test subjects in 16 degrees of plantar  
180 flexion. The soleus muscle was set to the model default values of 44 mm for fascicle length and 28  
181 degrees of pennation. We iteratively adjusted by fascicle length and pennation angle by 10%, ranging  
182 from 50% to 150% of the model default values (Fig. 4A). During each test iteration, we used a gradient  
183 based optimization procedure to find the tendon slack lengths that placed the ankle in static equilibrium.  
184 We then simulated maximal plantar flexor contractions at 30, 120, and 210 degrees/s and recorded the  
185 muscle force generated and shortening velocities of the gastrocnemius and soleus muscles. To test the  
186 effects of variations in gastrocnemius structure, we  
187 analyzed the contributions of gastrocnemius force  
188 towards ankle kinetics (complete model and  
189 simulation results available in supplemental data).

## 190 RESULTS

191 Resting fascicle length was positively and  
192 moderately correlated with plantar flexor work  
193 (**Figure 2A**) and peak torque (**Figure 3A**) during  
194 isokinetic plantar flexion contractions. More than  
195 half of the variability in plantar flexor work ( $R^2 =$   
196  $0.599$ ,  $P = 0.003$ ) and peak torque ( $R^2 = 0.521$ ,  $P =$   
197  $0.008$ ) during  $30^\circ/\text{s}$  isokinetic contractions was  
198 explained by resting fascicle length. However, the  
199 correlation between resting fascicle length and  
200 plantar flexor work and peak torque decreased  
201 during faster isokinetic contractions at  $120^\circ/\text{s}$  ( $0.413 > R^2 >$   
202  $0.415$ ,  $p < 0.024$ ) and  $210^\circ/\text{s}$  ( $0.477 > R^2 >$   
203  $0.494$ ,  $P < 0.013$ ). Fascicle length had the weakest  
204 correlation with peak torque during isometric  
205 conditions ( $R^2 = 0.325$ ,  $P = 0.053$ ). Subjects  
206 generated less torque and did less work as  
207 rotational velocity increased (**Table 1**).

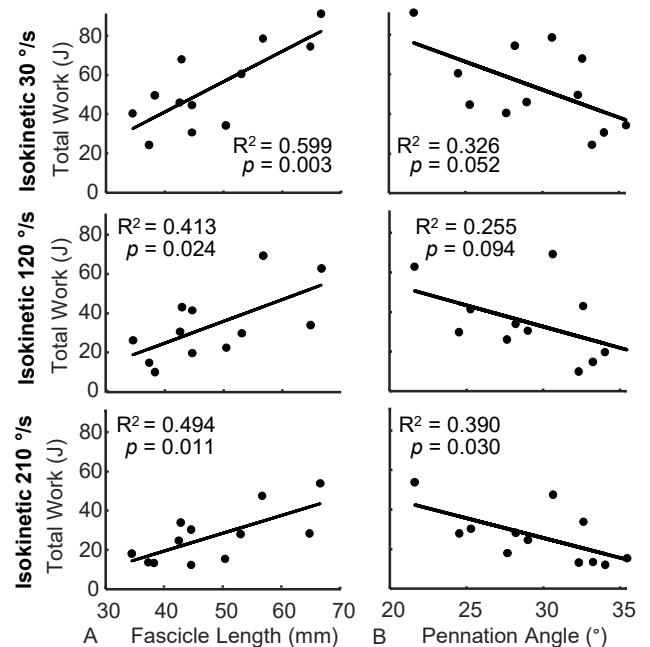

**Figure 2 (1 column). Plantar flexor work positively correlated with resting fascicle length during maximal isokinetic contractions.** Plantar flexor work produced at three isokinetic speeds ( $30^\circ/\text{s}$  – top row,  $120^\circ/\text{s}$  – middle row, and  $210^\circ/\text{s}$  – bottom row) positively correlated with (A) fascicle length and negatively correlated with (B) pennation angle. Fascicle lengths explained more variation in plantar flexor work than pennation angle ( $N=12$ ).

208 Pennation angle was negatively and  
 209 moderately correlated with plantar flexor work  
 210 ( $0.255 > R^2 > 0.39$ ,  $p < 0.052$ ) and peak torque  
 211 ( $0.296 > R^2 > 0.417$ ,  $p < 0.067$ ) during isokinetic  
 212 plantar flexion contractions (**Figure 2B and 3B**).  
 213 However, these correlations were weaker than  
 214 resting fascicle length for each test condition and  
 215 only reached statistical significance during 30°/s ( $P$   
 216 = 0.047) and 210 °/s ( $P = 0.023$ ) conditions for  
 217 measurements of peak torque. Peak isometric torque  
 218 was not explained by resting pennation angle  
 219 angle ( $R^2 = 0.09$ ,  $P = 0.345$ ).

220 Muscle thickness was moderately and  
 221 significantly correlated with fascicle length ( $R^2 =$   
 222  $0.536$ ,  $p < 0.001$ ) but not correlated with pennation  
 223 angle ( $R^2 = 0.064$ ,  $P = 0.084$ ). Despite the positive  
 224 correlation between resting muscle thickness and  
 225 fascicle length, resting muscle thickness was not  
 226 significantly correlated with function at any  
 227 isokinetic testing condition (**Table 2**). Muscle  
 228 thickness was positively and weakly correlated  
 229 with peak torque at isometric max ( $R^2 = 0.161$ ).  
 230 However, this correlation did not reach statistical  
 231 significance ( $P = 0.197$ ).

232 Muscle structure was weakly correlated  
 233 with subject stature (**Table 3**). Fascicle length was  
 234 weakly correlated with leg length ( $R^2 = 0.084$ ,  $P =$   
 235  $0.046$ ) and body mass ( $R^2 = 0.132$ ,  $P = 0.011$ ).  
 236 Pennation angle was weakly correlated with body  
 237 mass ( $R^2 = 0.098$ ,  $P = 0.030$ ) but not leg length.  
 238 Muscle thickness was not correlated with either  
 239 leg length or body mass.

240 Longer muscle fascicles had a greater  
 241 effect on simulated plantar flexor function  
 242 compared to similar decreases in pennation angle  
 243 (**Figure 4B and C**). The effects of small increases  
 244 in fascicle length increased with greater rates of  
 245 ankle rotation during these simulated isokinetic  
 246 plantar flexion contractions. A 1 percent increase  
 247 in the gastrocnemius fascicle length led to a 0.3%  
 248 increase in peak plantar flexor torque at 30  
 249 degrees per second and 0.8% increase in peak  
 250 plantar flexor torque at 210 degrees per second  
 251 (**Figure 4B**). These small increases in  
 252 gastrocnemius fascicle length had a greater effect  
 253 on simulated plantar flexor work done by the

**Table 1.** Descriptive data on subject plantar flexor function and musculoskeletal parameters.

|                                     | Mean ± Standard Deviation |
|-------------------------------------|---------------------------|
| <b>Plantarflexor Kinetics</b>       |                           |
| Peak Isometric Torque (N*m)         | 116.8 ± 39.1              |
| Peak Isokinetic Torque 30°/s (N*m)  | 95.1 ± 31.3               |
| Peak Isokinetic Torque 120°/s (N*m) | 50.1 ± 24.0               |
| Peak Isokinetic Torque 210°/s (N*m) | 35.9 ± 17.0               |
| Total Work 30°/s (J)                | 53.7 ± 20.0               |
| Total Work 120°/s (J)               | 33.8 ± 17.3               |
| Total Work 210°/s (J)               | 26.6 ± 12.9               |
| <b>Musculoskeletal Parameters</b>   |                           |
| Range of Motion (degrees)           | 53.7 ± 4.2                |
| Fascicle Length (mm)                | 48.0 ± 10.0               |
| Pennation Angle (degrees)           | 29.5 ± 4.1                |
| Muscle Thickness (mm)               | 23.2 ± 4.2                |
| Leg Length (mm)                     | 362.2 ± 36.9              |
| Mass (kg)                           | 67.3 ± 19.3               |

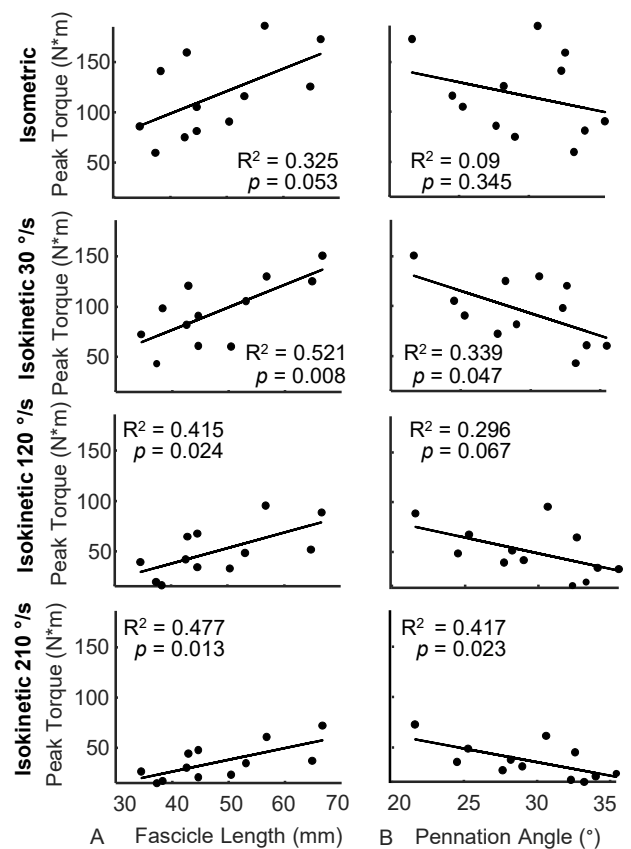

**Figure 3 (1 column).** Peak plantar flexor torque positively correlated with resting fascicle length during maximal isokinetic contractions. Peak plantar flexor torque produced at three isokinetic speeds (30°/s – second row, 120°/s – third row, and 210°/s – bottom row) is positively correlated with (A) fascicle length and negatively correlated with (B) pennation angle. Conversely, fascicle length explains less variation in peak isometric torque (top row) and pennation angle is not correlated with isometric torque. Fascicle lengths explained more variation in plantar flexor work than pennation angle (N=12).

254 ankle joint (**Figure 4C**). Increasing the gastrocnemius fascicle length by 1% increased joint work by  
 255 0.6% during 30 degrees per second contractions and 1.0% during 210 degrees per second  
 256 contractions.

**Table 2.** Correlations between muscle thickness and plantarflexion kinetics

|                    | Peak Torque      | Total Work       |
|--------------------|------------------|------------------|
| Isometric Max      | 0.153<br>(0.209) | -                |
| Isokinetic 30 °/s  | 0.124<br>(0.262) | 0.172<br>(0.181) |
| Isokinetic 120 °/s | 0.104<br>(0.307) | 0.117<br>(0.276) |
| Isokinetic 210 °/s | 0.076<br>(0.387) | 0.089<br>(0.347) |

**Table 3.** Correlations between muscle structure and subject stature.

|                  | Leg Length       | Mass             | Muscle Thickness |
|------------------|------------------|------------------|------------------|
| Fascicle Length  | 0.084<br>(0.046) | 0.132<br>(0.011) | 0.53<br>(<0.001) |
| Pennation Angle  | 0.013<br>(0.445) | 0.098<br>(0.030) | 0.063<br>(0.083) |
| Muscle Thickness | 0.070<br>(0.069) | 0.037<br>(0.193) | -                |

Correlations of determination ( $R^2$ ) and regression  $p$ -values are reported as  $R^2$  ( $p$ -value)

Correlations of determination ( $R^2$ ) and regression  $p$ -values are reported as  $R^2$  ( $p$ -value)

257 These increases in plantar flexor kinetics caused by longer gastrocnemius muscle fascicles  
 258 were explained by 2 factors (**Figure 5**). First, the longer muscle fascicles generated greater force at  
 259 each joint angle. Second, the longer muscle fascicles continued to generate muscle force in deeper  
 260 plantar flexion while the shorter muscle fascicles stopped producing force starting at 40 degrees of  
 261 plantar flexion. However, similar changes in pennation angle had weaker effects on plantar flexor  
 262 kinetics (**Figure 4 B and C**).

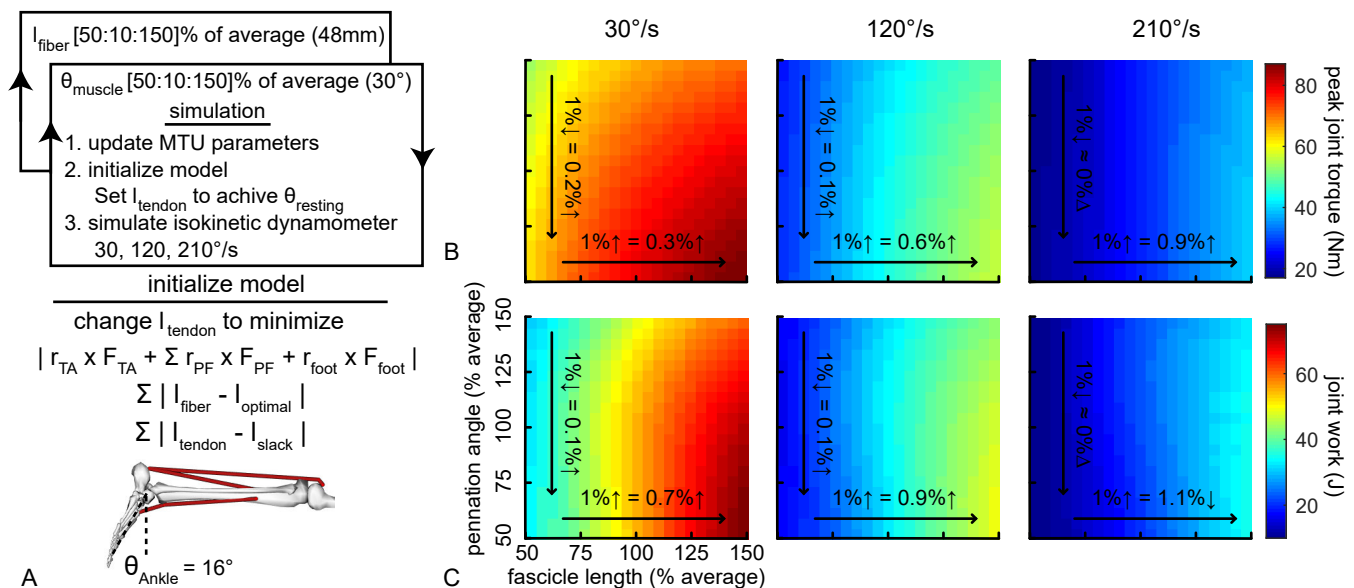

**Figure 4 (2 column). Longer muscle fascicles generate greater plantar flexor torque and work during simulated isokinetic contractions.** We simulated the effects of varying fascicle length ( $x$ -axis) and pennation angle ( $y$ -axis) using a simplified musculoskeletal model of the lower leg (A). After each model permutation was initialized by solving for tendon slack lengths to reach static equilibrium at 16 degrees plantar flexion, we simulated maximal isokinetic plantar flexion contractions at 30, 120, and 210 degrees per second. Small increases in fascicle length had a greater effect on peak torque (B) than similarly small decreases in pennation angle. Similar to peak joint torque, longer fascicles also increased the amount of work done by the muscle during maximal contractions at each on speed (C). We tested a wide range ( $\pm 50\%$ ) of fascicle lengths and pennation angles centered at the average measurements made in the *in vivo* experiment. Peak torque was calculated as the product of the active contributions of the gastrocnemius muscle and the muscle moment arm (Nm). Joint work was calculated as the integral of the torque-angle curve.

## 263 DISCUSSION

264 In this study, we demonstrated the relationship between  
265 plantar flexor structure and function in a cohort of healthy young  
266 adults. Our findings support our hypothesis that resting fascicle length  
267 is positively correlated with peak plantar flexor torque and work while  
268 pennation angle has a smaller, negative correlation with peak plantar  
269 flexor torque and work. To determine if plantarflexor function was  
270 simply explained by muscle thickness, we regressed muscle  
271 thickness with plantar flexor kinetics and found no effect on plantar  
272 flexor torque or work in any condition. Although fascicle length has  
273 been positively correlated with muscle force in isolated muscle  
274 experiments (Lieber, 1997); to our knowledge, this is the first study to  
275 link natural variation in gastrocnemius fascicle length with plantar  
276 flexor torque and work in healthy adults (Ema et al., 2016).

277 Our measurements of medial gastrocnemius structure and  
278 isokinetic plantar flexor torque and work compare favorably with  
279 previous reports in the literature. We decided to measure resting  
280 muscle structure at 16 degrees plantar flexion to approximate the  
281 ankle angle at which medial gastrocnemius muscle-tendon slack  
282 occurs (Zellers et al., 2018). Other measurements of gastrocnemius  
283 structure were acquired with the ankle either under load or neutrally  
284 aligned which may explain slightly longer (4-9 mm) and less pennate  
285 (6-11 degrees) muscle fascicles (Baxter and Piazza, 2014; Kubo et  
286 al., 2003; Thom et al., 2007) than those we measured in this current  
287 study. Similarly, our measurements of pennation at slack are  
288 comparable to earlier measurements in the medial gastrocnemius at  
289 the same position (Hoang et al., 2007). Our measurements of plantar  
290 flexion torque and work capacity compares well with the literature.  
291 Our values for torque and work done at 30 and 120 degrees per  
292 second compares well with previously reported values (Randhawa  
293 and Wakeling, 2013; Woodson et al., 1995) and our values for  
294 maximal isometric torque compares well with studies with similar  
295 subject positioning (Arampatzis et al., 2006). A previous study  
296 reported higher values for torque generation, however in this case,  
297 the subjects were all male and were seated rather than positioned in  
298 prone (Baxter and Piazza, 2014).

299 Our results suggest that fascicle length and pennation angle,  
300 which govern absolute muscle shortening velocity (Lieber and Ward,  
301 2011), have greater effects on isokinetic plantar flexor function than  
302 muscle thickness. Our results are consistent with the force-length and force-velocity properties of  
303 muscle. While fascicles of different lengths undergo the same absolute contractile velocity during a  
304 given isokinetic contraction, longer fascicles have additional sarcomeres in series which extend the  
305 functional operating length of the muscle while reducing relative shortening velocity. This enables  
306 longer fascicles to operate at slower velocities on the force-velocity curve, increasing force production  
307 at all isokinetic speeds (**Figure 6A**) (Lieber and Fridén, 2000). Similarly, the force-velocity effects are  
308 also affected by variation in pennation angle. Greater muscle pennation increases the fascicle

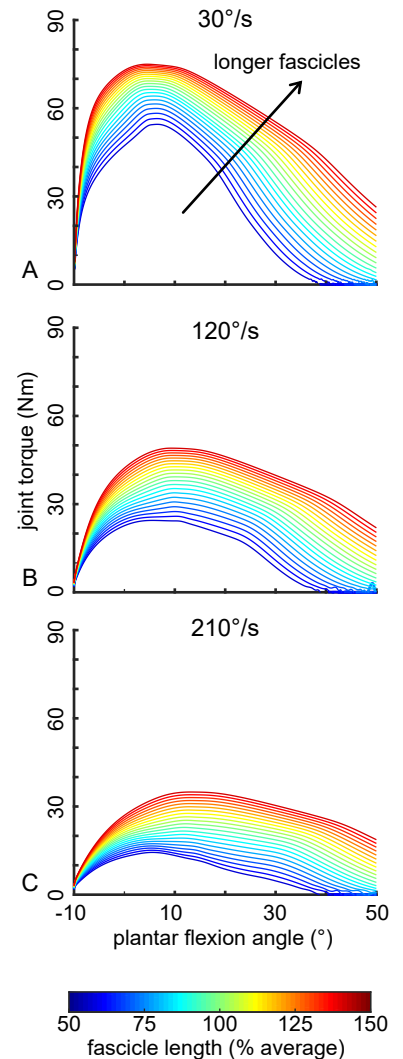

**Figure 5 (1 column).** Longer muscle fascicles lead to increased plantar flexor torque throughout the ankle range of motion during simulated isokinetic contractions. Longer gastrocnemius fascicles (more red) generated greater amounts of plantar flexor torque throughout the entire range of motion compared to shorter fascicles (more blue). These effects were similar at slow (A), medium (B), and fast (C) simulated isokinetic contraction speeds.



309 shortening demands for a given muscle  
310 shortening contraction. Thus, more  
311 pennate muscles generate less force and do  
312 less work in isokinetic conditions (**Figure**  
313 **6B**). Our experimental findings that fascicle  
314 length explained more variation in plantar  
315 flexor kinetics than pennation angle agrees  
316 with the theoretical framework of the force-  
317 velocity properties of muscle and our recent  
318 computational model (Baxter et al., 2019) as  
319 well as the computational results described  
320 in this paper (**Figure 4 and 5**).

321 Our results highlight the effects of  
322 natural variability in muscle fascicle lengths  
323 on plantar flexor function. Force-length  
324 characteristics have been demonstrated in humans *in vivo* (Maganaris, 2001), however these results  
325 were only reported in isometric contractions. Despite evidence of variations in muscle structure  
326 between different populations of human subjects (Abe et al., 2000; Hullfish et al., 2019b; Kearns et al.,  
327 2000; Kubo et al., 2003; Lee and Piazza, 2009), there are few studies reporting the relationship  
328 between variations in resting fascicle length or pennation angle and dynamic muscle function in  
329 humans (Ema et al., 2016). Outside of the plantar flexors, one study found that elbow extensor velocity  
330 under no load was positively correlated with muscle volume and pennation angle but not muscle length  
331 (Wakahara et al., 2013). However, this previous study did not directly measurement fascicle length,  
332 instead they used muscle length as a surrogate for fascicle length. Differences in fascicle length  
333 explains almost 50% of reduced fascicle shortening velocity between young and old men (Thom et al.,  
334 2007). Our previous work did not find a relationship between fascicle length and peak torque during  
335 isokinetic contractions at 30, 120 and 210 °/s. However, these previous studies measured fascicle  
336 length at neutral, which is a less reliable position to measure fascicle length given the sensitive  
337 relationship between passive fascicle load and length (Aeles et al., 2017).

338 We decided to measure the medial gastrocnemius because of previous observations linking  
339 structural changes in that muscle following Achilles tendon rupture to functional deficits (Baxter et al.,  
340 2018; Hullfish et al., 2019a) coupled with similar observations with other groups (Peng et al., 2017;  
341 Peng et al., 2019). Prior groups linking plantar flexor torque measurements with medial gastrocnemius  
342 structure without accounting for the other two triceps surae muscles (Hauraix et al., 2015; Thom et al.,  
343 2007). These groups approximated the torque generated by the gastrocnemius by multiplying total  
344 plantar flexor torque values by constant value ranging from 0.159 (Fukunaga et al., 1996) to 0.218  
345 (Morse et al., 2005). As these are constant values, this adjustment would not affect the correlations we  
346 have found in this study. In addition, we performed an analysis on the publically available data set  
347 (Crouzier et al., 2018) and determined that fascicle length and pennation angles of the medial  
348 gastrocnemius both correlate with the lateral gastrocnemius and soleus muscles ( $R^2 > 0.413$ ,  $P <$   
349  $0.023$ ).

350 This study was affected by several limitations. Despite having a relatively small sample size  
351 ( $N=12$ ), our *in vivo* findings agree with both basic principles of skeletal muscle mechanics (Lieber and  
352 Fridén, 2000) and our computational model. We did not confirm maximal effort during contractions  
353 across the triceps surae using electromyography. Instead, we provided subjects verbal encouragement  
354 and real-time visual feedback (Drazan et al., 2019) and had each subject repeat each maximal

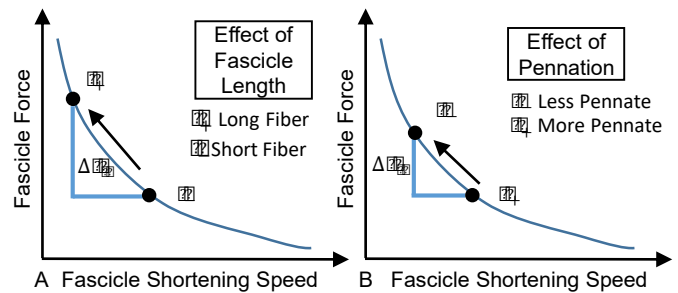

**Figure 6 (1 column). Longer and less pennate muscle fascicles reduce the shortening speed demands during a given isokinetic contraction.** Longer and (A) less pennate (B) fascicles decrease relative shortening velocity during a given joint rotation, which results in increased fascicle force. The force-velocity properties of skeletal muscle are more sensitive to changes in fascicle length than pennation angle, which agrees with our experimental findings that ankle torque is more strongly correlated with fascicle length than pennation angle.

355 contraction condition until their peak torques were consistent between consecutive trials (McNair et al.,  
356 1996). We used muscle thickness as a proxy for muscle volume, which is positively correlated with  
357 measurements of muscle volume acquired with magnetic resonance imaging ( $R^2 = 0.527$ ,  $P < 0.001$ )  
358 (Crouzier et al., 2018) and cadaveric measurements ( $R^2 = 0.497$ ,  $P = 0.017$ ) (Bandholm et al., 2007).  
359 We did not quantify plantar flexor moment arm, which may affect muscle shortening dynamics and  
360 plantar flexor kinetics (Baxter and Piazza, 2014; Nagano and Komura, 2003). While considering medial  
361 gastrocnemius structure to be a surrogate measure of the triceps surae muscles (Crouzier et al., 2018),  
362 variations in lateral gastrocnemius and soleus structure might strengthen the correlation between  
363 plantar flexor structure and function, it will not decrease our observed correlations.

364 In conclusion, our study demonstrates the link between resting structure of the medial  
365 gastrocnemius with isokinetic plantar flexion function. These findings may have important implications  
366 on plantar flexor function following muscle remodeling elicited through injury, training, and aging.  
367 However, the link between isokinetic plantar flexor function and ambulatory function requires further  
368 investigation, and future work should directly test the link between muscle structure and movement  
369 biomechanics.

## 370 REFERENCES

- 371 **Abe, T., Kumagai, K. and Brechue, W. F.** (2000). Fascicle length of leg muscles is greater in  
372 sprinters than distance runners. *Med. Sci. Sports Exerc.* **32**, 1125–1129.
- 373 **Abe, T., Fukashiro, S., Harada, Y. and Kawamoto, K.** (2001). Relationship between sprint  
374 performance and muscle fascicle length in female sprinters. *J. Physiol. Anthropol. Appl.*  
375 *Human Sci.* **20**, 141–147.
- 376 **Aeles, J., Lenchant, S., Vanlommel, L. and Vanwanseele, B.** (2017). Bilateral differences in  
377 muscle fascicle architecture are not related to the preferred leg in jumping athletes. *Eur.*  
378 *J. Appl. Physiol.* **117**, 1453–1461.
- 379 **Arampatzis, A., Karamanidis, K., Stafilidis, S., Morey-Klapsing, G., DeMonte, G. and**  
380 **Brüggemann, G.-P.** (2006). Effect of different ankle- and knee-joint positions on  
381 gastrocnemius medialis fascicle length and EMG activity during isometric plantar flexion.  
382 *J. Biomech.* **39**, 1891–1902.
- 383 **Bandholm, T., Sonne-Holm, S., Thomsen, C., Bencke, J., Pedersen, S. A. and Jensen, B.**  
384 **R.** (2007). Calf Muscle Volume Estimates: Implications for Botulinum Toxin Treatment?  
385 *Pediatr. Neurol.* **37**, 263–269.
- 386 **Baxter, J. R. and Hast, M. W.** (2019). Plantarflexor metabolics are sensitive to resting ankle  
387 angle and optimal fiber length in computational simulations of gait. *Gait Posture* **67**, 194–  
388 200.
- 389 **Baxter, J. R. and Piazza, S. J.** (2014). Plantar flexor moment arm and muscle volume predict  
390 torque-generating capacity in young men. *J. Appl. Physiol.* **116**, 538–44.
- 391 **Baxter, J. R., Hullfish, T. J. and Chao, W.** (2018). Functional deficits may be explained by  
392 plantarflexor remodeling following Achilles tendon rupture repair: Preliminary findings. *J.*  
393 *Biomech.* **79**, 238–242.
- 394 **Baxter, J. R., Farber, D. C. and Hast, M. W.** (2019). Plantarflexor fiber and tendon slack length  
395 are strong determinates of simulated single-leg heel raise height. *J. Biomech.*

- 396 **Bobbert, M. F., Huijting, P. A. and van Ingen Schenau, G. J.** (1986). An estimation of power  
397 output and work done by the human triceps surae muscle-tendon complex in jumping. *J.*  
398 *Biomech.* **19**, 899–906.
- 399 **Brorsson, A., Grävare Silbernagel, K., Olsson, N. and Nilsson Helander, K.** (2018). Calf  
400 Muscle Performance Deficits Remain 7 Years After an Achilles Tendon Rupture. *Am. J.*  
401 *Sports Med.* **46**, 470–477.
- 402 **Crouzier, M., Lacourpaille, L., Nordez, A., Tucker, K. and Hug, F.** (2018). Neuromechanical  
403 coupling within the human triceps surae and its consequence on individual force-sharing  
404 strategies. *J. Exp. Biol.* **221**, jeb187260.
- 405 **Delp, S. L., Anderson, F. C., Arnold, A. S., Loan, P., Habib, A., John, C. T., Guendelman, E.**  
406 **and Thelen, D. G.** (2007). OpenSim: open-source software to create and analyze  
407 dynamic simulations of movement. *IEEE Trans. Biomed. Eng.* **54**, 1940–1950.
- 408 **Drazan, J. F., Hullfish, T. J. and Baxter, J. R.** (2019). An automatic fascicle tracking algorithm  
409 quantifying gastrocnemius architecture during maximal effort contractions. *PeerJ* **7**,  
410 e7120.
- 411 **Ellis, R. G., Sumner, B. J. and Kram, R.** (2014). Muscle contributions to propulsion and  
412 braking during walking and running: Insight from external force perturbations. *Gait*  
413 *Posture* **40**, 594–599.
- 414 **Ema, R., Akagi, R., Wakahara, T. and Kawakami, Y.** (2016). Training-induced changes in  
415 architecture of human skeletal muscles: Current evidence and unresolved issues. *J.*  
416 *Phys. Fit. Sports Med.* **5**, 37–46.
- 417 **Fukunaga, T., Roy, R. R., Shellock, F. G., Hodgson, J. A. and Edgerton, V. R.** (1996).  
418 Specific tension of human plantar flexors and dorsiflexors. *J. Appl. Physiol. Bethesda Md*  
419 *1985* **80**, 158–165.
- 420 **Graf, A., Judge, J. O., Öunpuu, S. and Thelen, D. G.** (2005). The effect of walking speed on  
421 lower-extremity joint powers among elderly adults who exhibit low physical performance.  
422 *Arch. Phys. Med. Rehabil.* **86**, 2177–2183.
- 423 **Hauraix, H., Nordez, A., Guilhem, G., Rabita, G. and Dorel, S.** (2015). In vivo maximal  
424 fascicle-shortening velocity during plantar flexion in humans. *J. Appl. Physiol.* **119**,  
425 1262–1271.
- 426 **Hoang, P. D., Herbert, R. D., Todd, G., Gorman, R. B. and Gandevia, S. C.** (2007). Passive  
427 mechanical properties of human gastrocnemius muscle tendon units, muscle fascicles  
428 and tendons in vivo. *J. Exp. Biol.* **210**, 4159–4168.
- 429 **Hullfish, T. J., O'Connor, K. M. and Baxter, J. R.** (2019a). Gastrocnemius muscle remodeling  
430 explains functional deficits three months following Achilles tendon rupture. *BioRxiv*  
431 *Prepr.* 585505.
- 432 **Hullfish, T. J., O'Connor, K. M. and Baxter, J. R.** (2019b). Gastrocnemius fascicles are  
433 shorter and more pennate throughout the first month following acute Achilles tendon  
434 rupture. *PeerJ* **7**, e6788.

- 435 **Judge, J. O., Davis, R. B. and Ounpuu, S.** (1996). Step length reductions in advanced age:  
436 the role of ankle and hip kinetics. *J. Gerontol. A. Biol. Sci. Med. Sci.* **51**, M303–M312.
- 437 **Kawakami, Y., Ichinose, Y., Kubo, K., Ito, M., Imai, M. and Fukunaga, T.** (2000). Architecture  
438 of Contracting Human Muscles and Its Functional Significance. *J. Appl. Biomech.* **16**,  
439 88–97.
- 440 **Kearns, C. F., Abe, T. and Brechue, W. F.** (2000). Muscle enlargement in sumo wrestlers  
441 includes increased muscle fascicle length. *Eur. J. Appl. Physiol.* **83**, 289–296.
- 442 **Kubo, K., Kanehisa, H., Azuma, K., Ishizu, M., Kuno, S.-Y., Okada, M. and Fukunaga, T.**  
443 (2003). Muscle Architectural Characteristics in Young and Elderly Men and Women. *Int.*  
444 *J. Sports Med.* **24**, 125–130.
- 445 **Kumagai, K., Abe, T., Brechue, W. F. W. F., Ryushi, T., Takano, S. and Mizuno, M.** (2000).  
446 Sprint performance is related to muscle fascicle length in male 100-m sprinters. *J. Appl.*  
447 *Physiol.* **88**, 811–816.
- 448 **Lee, S. S. M. and Piazza, S. J.** (2009). Built for speed: musculoskeletal structure and sprinting  
449 ability. *J. Exp. Biol.* **212**, 3700–3707.
- 450 **Lieber, R. L.** (1997). Muscle fiber length and moment arm coordination during dorsi- and  
451 plantarflexion in the mouse hindlimb. *Acta Anat. (Basel)* **159**, 84–89.
- 452 **Lieber, R. L. and Fridén, J.** (2000). Functional and clinical significance of skeletal muscle  
453 architecture. *Muscle Nerve* **23**, 1647–1666.
- 454 **Lieber, R. L. and Ward, S. R.** (2011). Skeletal muscle design to meet functional demands.  
455 *Philos. Trans. R. Soc. Lond. B. Biol. Sci.* **366**, 1466–1476.
- 456 **Maganaris, C. N. C. C. N.** (2001). Force-length characteristics of in vivo human skeletal  
457 muscle. *Acta Physiol Scand* **172**, 279–285.
- 458 **McNair, P. J., Depledge, J., Brett Kelly, M. and Stanley, S. N.** (1996). Verbal encouragement:  
459 effects on maximum effort voluntary muscle: action. *Br. J. Sports Med.* **30**, 243–245.
- 460 **Morse, C. I., Thom, J. M., Birch, K. M. and Narici, M. V.** (2005). Changes in triceps surae  
461 muscle architecture with sarcopenia. *Acta Physiol. Scand.* **183**, 291–298.
- 462 **Morse, C. I., Thom, J. M., Mian, O. S., Birch, K. M. and Narici, M. V.** (2007). Gastrocnemius  
463 specific force is increased in elderly males following a 12-month physical training  
464 programme. *Eur. J. Appl. Physiol.* **100**, 563–570.
- 465 **Morton, R. F., Hebel, J. R. and McCarter, R. J.** (2005). *A Study Guide to Epidemiology and*  
466 *Biostatistics.* Jones & Bartlett Learning.
- 467 **Nagano, A. and Komura, T.** (2003). Longer moment arm results in smaller joint moment  
468 development, power and work outputs in fast motions. *J. Biomech.* **36**, 1675–1681.



- 469 **Nesser, T. W., Latin, R. W., Berg, K. and Prentice, E.** (1996). Physiological Determinants of  
470 40-Meter Sprint Performance in Young Male Athletes: *J. Strength Cond. Res.* **10**, 263–  
471 267.
- 472 **Peng, W.-C., Chang, Y.-P., Chao, Y.-H., Fu, S., Rolf, C., Shih, T. T., Su, S.-C. and Wang, H.-**  
473 **K.** (2017). Morphomechanical alterations in the medial gastrocnemius muscle in patients  
474 with a repaired Achilles tendon: Associations with outcome measures. *Clin. Biomech.*  
475 **43**, 50–57.
- 476 **Peng, W.-C., Chao, Y.-H., Fu, A. S. N., Fong, S. S. M., Rolf, C., Chiang, H., Chen, S. and**  
477 **Wang, H.-K.** (2019). Muscular Morphomechanical Characteristics After an Achilles  
478 Repair. *Foot Ankle Int.* 1071100718822537.
- 479 **Randhawa, A. and Wakeling, J. M.** (2013). Associations between muscle structure and  
480 contractile performance in seniors. *Clin. Biomech.* **28**, 705–711.
- 481 **Salzano, M. Q., Cox, S. M., Piazza, S. J. and Rubenson, J.** (2018). American Society of  
482 Biomechanics Journal of Biomechanics Award 2017: High-acceleration training during  
483 growth increases optimal muscle fascicle lengths in an avian bipedal model. *J. Biomech.*  
484 **80**, 1–7.
- 485 **Stenroth, L. and Sipilä, S.** (2016). Slower Walking Speed in Older Men Improves Triceps  
486 Surae Force Generation Ability. *Med. Sci. Sports Exerc.*
- 487 **Stenroth, L., Sillanpää, E., McPhee, J. S., Narici, M. V., Gapeyeva, H., Pääsuke, M.,**  
488 **Barnouin, Y., Hogrel, J.-Y., Butler-Browne, G., Bijlsma, A., et al.** (2015). Plantarflexor  
489 Muscle-Tendon Properties are Associated With Mobility in Healthy Older Adults. *J.*  
490 *Gerontol. A. Biol. Sci. Med. Sci.* **70**, 996–1002.
- 491 **Suzuki, T., Bean, J. F. and Fielding, R. A.** (2001). Muscle Power of the Ankle Flexors Predicts  
492 Functional Performance in Community-Dwelling Older Women. *J. Am. Geriatr. Soc.* **49**,  
493 1161–1167.
- 494 **Thom, J. M., Morse, C. I. ., Birch, K. M. and Narici, M. V.** (2007). Influence of muscle  
495 architecture on the torque and power-velocity characteristics of young and elderly men.  
496 *Eur. J. Appl. Physiol.* **100**, 613–619.
- 497 **Wakahara, T., Kanehisa, H., Kawakami, Y., Fukunaga, T. and Yanai, T.** (2013). Relationship  
498 between Muscle Architecture and Joint Performance during Concentric Contractions in  
499 Humans. *J. Appl. Biomech.* **29**, 405–412.
- 500 **Woodson, C., Bandy, W. D., Curis, D. and Baldwin, D.** (1995). Relationship of Isokinetic Peak  
501 Torque With Work and Power for Ankle Plantar Flexion and Dorsiflexion. *J. Orthop.*  
502 *Sports Phys. Ther.* **22**, 113–115.
- 503 **Zellers, J. A., Carmont, M. R. and Silbernagel, K. G.** (2018). Achilles Tendon Resting Angle  
504 Relates to Tendon Length and Function. *Foot Ankle Int.* **39**, 343–348.
- 505
